# 1 Kinship does not predict the structure of a shark social network

2

3 Johann Mourier<sup>1,2,3</sup>, Serge Planes<sup>1,2</sup>

4

5 <sup>1</sup> PSL Research University, EPHE-UPVD-CNRS, USR 3278, Université de Perpignan,

6 Perpignan, France

7 <sup>2</sup> Laboratoire d'Excellence "CORAIL," EPHE, PSL Research University, UPVD, CNRS,

8 USR 3278 CRIOBE, Papetoai, Moorea, French Polynesia

9 <sup>3</sup> UMR MARBEC (IRD, Ifremer, Univ. Montpellier, CNRS), Sète, France

10

11 ORCID: JM, 0000-0001-9019-1717; SP, 0000-0002-5689-5371

12

13 Corresponding author:

14 Johann Mourier

15 Email: [johann.mourier@gmail.com](mailto:johann.mourier@gmail.com)

16

17 **ABSTRACT:**

18 Genetic relatedness in animal societies is often a factor that drives the structure of social  
19 groups. In the marine world, most studies which have investigated this question have focused  
20 on marine mammals such as whales and dolphins. For sharks, recent studies have  
21 demonstrated preferential associations among individuals from which social communities  
22 emerge. Assortment patterns have been found according to phenotypic or behavioural traits  
23 but the role of genetic relatedness in shaping the social structure of adult shark populations  
24 has, to the best of our knowledge, never been investigated. Here, we used a social network  
25 analysis crossed with DNA microsatellite genotyping to investigate the role of the genetic  
26 relatedness in the social structure of a blacktip reef shark (*Carcharhinus melanopterus*)  
27 population. Based on data from 156 groups of sharks, we used generalized affiliation indices  
28 to isolate social preferences from non-social associations, controlling for the contribution of  
29 sex, size, gregariousness, spatial and temporal overlap on social associations, to test for the  
30 influence of genetic relatedness on social structure. Kinship was not a predictor of  
31 associations and affiliations among sharks at the dyad or community levels as individuals  
32 tended to associate independently of the genetic relatedness among them. The lack of  
33 parental care in this species may contribute to the breakdown of family links in the  
34 population early in life, thereby preventing the formation of kin-based social networks.

35

36 Keywords: genetic relatedness, assortment, social organisation, *Carcharhinus melanopterus*,  
37 elasmobranch

38

## 39 INTRODUCTION

40 Group formation is an adaptive strategy, widespread across the animal kingdom, that can take  
41 various forms, from temporary unstable associations to long-term stable groups in complex  
42 societies (Krause and Ruxton 2002). Understanding the factors that influence the formation  
43 and evolution of social groups is important in order to understand the evolution of animal  
44 societies as well as to gain insight into population dynamics and to inform conservation  
45 strategy (Snijders et al. 2017). Associations among individuals can provide benefits to  
46 improve individual fitness, for example, by reducing predation risk or improving foraging  
47 efficiency (Krause and Ruxton 2002). While individuals can benefit by simply associating  
48 with other conspecifics (Kerth et al. 2011), the benefit of grouping can be enhanced by  
49 associating with similar individuals, also called social assortativity. By associating with  
50 individuals of the same size or the same sex, individuals are more likely to avoid conflict or  
51 harassment (Dadda et al. 2005) and their risk of predation is reduced via the confusion effect  
52 (Landeau and Terborgh 1986). Further, assorting with kin can also provide indirect fitness  
53 benefits (Hamilton 1964). Kin assortment has been shown to provide benefits in reducing  
54 aggression (Olsén and JäUrv), increasing growth rate (Brown and Brown 1993) or allowing  
55 cooperative behaviour such as predator inspection (Milinski 1987).

56 Kin structuring has received extensive attention in many animal societies, especially  
57 where animals form stable breeding groups or where groups arise from the retention of  
58 offspring and delayed dispersal that facilitates the development of interactions with relative  
59 and kin-based groups (Wolf and Trillmich 2008; Hatchwell Ben J. 2010; Wiszniewski et al.  
60 2010). In groups composed of relatives, kin selection should play a role in determining  
61 cooperation among group members (Hamilton 1964), although cooperation can arise also  
62 between non-kin (Clutton-Brock 2009). The role of relatedness in structuring animal societies  
63 that are characterised by a dynamic fission-fusion social system has been well studied in

64 species with parental care such as dolphins, giraffes, elephants or bats (Wittemyer et al. 2009;  
65 Wiszniewski et al. 2010; Kerth et al. 2011; Carter et al. 2013), but much less is known for  
66 species without parental care, as is the case for many species of fish (but see Croft et al.  
67 2012). While the link between social networks and kinship has been extensively studied in  
68 terrestrial animals (Holekamp et al. 2012; Carter et al. 2013; Arnberg et al. 2015), kinship  
69 structure in social networks of marine and freshwater organisms has been primarily limited to  
70 marine mammals (Wiszniewski et al. 2010; Mann et al. 2012; Reisinger et al. 2017). Several  
71 cetacean societies show strong kin-based social network structures. However, in fishes, kin  
72 structure is less clear. Work on shoaling fish, for example, did not find kin assortment, even  
73 in species that are capable of kin discrimination (Croft et al. 2012). While sharks have  
74 recently been shown to be able to develop preferred associations and organise into structured  
75 social networks (Mourier et al. 2018), kinship has only been explored in one case study that  
76 focused on juvenile sharks (Guttridge et al. 2011) but did not find any clear influence of  
77 kinship in association patterns even for juvenile sharks, highlighting a lack of information on  
78 the potential for kin-based associations to arise in shark populations. Another study on  
79 spotted eagle rays did not find any evidence of relatedness in the formation of groups (Newby  
80 et al. 2014), although association strength was not quantified using association indices.

81 Overall, most studies that have explored the relationship between genetic relatedness and  
82 social interactions have focused on highly social species and in particular, on species that  
83 exhibit parental care (Wolf and Trillmich 2008; Wiszniewski et al. 2010; Kerth et al. 2011).  
84 Studying less social vertebrates should significantly improve our understanding of how social  
85 and genetic structure interact to shape the evolution of sociality in the animal kingdom.

86 In this study, we investigate the interaction between socio-spatial patterns and genetic  
87 relatedness in a population of blacktip reef sharks (*Carcharhinus melanopterus*) monitored  
88 over a 3-year period on the north shore of Moorea Island (French Polynesia). Sharks



89 represent an interesting and unique model to explore the extent to which individuals interact  
90 with genetically related associates due to ecological traits that differ from most social  
91 vertebrates. Like most social animals, sharks are now increasingly recognised as being  
92 capable of complex social interactions, developing preferred social associations (Guttridge et  
93 al. 2009; Jacoby et al. 2010; Mourier et al. 2012), showing unexpected learning abilities  
94 (Guttridge et al. 2013; Mourier et al. 2017), developing foraging strategies by associating  
95 with other species to improve predation success (Labourgade et al. 2020) and developing  
96 patterns of leadership and dominance hierarchy (Guttridge et al. 2011; Jacoby et al. 2016;  
97 Brena et al. 2018). However, contrary to many social organisms, reef sharks do not show  
98 parental care and almost all shark species drop their progeny in specific nurseries outside  
99 adult habitats and leave them to interact by themselves (Mourier and Planes 2013). These  
100 discrete nurseries are chosen to potentially provide the neonates with a safe environment  
101 where they will spend their first months of life. Recent studies suggested that females show  
102 reproductive and even natal philopatry to these particular birthing grounds (Mourier and  
103 Planes 2013; Feldheim et al. 2014), suggesting that newborn sharks may have the opportunity  
104 to develop strong relationships with close kin. When juvenile sharks reach a certain size or  
105 age, they leave their nursery to explore a wider home range (Chapman et al. 2009); they then  
106 integrate within the adult population and start interacting with older individuals, but it is not  
107 known whether they coexisted with other newborn during their juvenile stage or disperse  
108 alone. Therefore, while aggregations of kin are possible during the early stages, it is currently  
109 unknown if they persist through adulthood after dispersal. In shark populations, interactions  
110 between kin are also diluted by the presence of numerous neighbours and average relatedness  
111 quickly drops with increasing group size. In some shark species, the likelihood of associating  
112 with a related peer is reduced due to small litter size and a high mortality rate at the juvenile  
113 stage, leading to a lack of first order relatives to reach adulthood. However, in a closed

114 system, such as an isolated island, and in the case of blacktip reef sharks which spend their  
115 entire life cycle within Moorea (Mourier and Planes 2013), relatives will have more chances  
116 to encounter each other and to interact in social groups. Thus, in these conditions, the limited  
117 number of related pairs might decrease the risk of inbreeding.

118 To understand the assortative forces which underpin the structural properties of the  
119 system is challenging for elusive underwater animals. As the blacktip reef shark displays a  
120 high degree of site fidelity (Papastamatiou et al. 2009) and shares some of its areas with  
121 many conspecifics (Mourier et al. 2012), exploring this network holds the potential to work  
122 out the relationship between spatial, social and genetic structure in a reef shark. Size, sex and  
123 gregariousness of sharks have been shown to influence assortment at the population and  
124 community levels (Mourier et al. 2012; Mourier et al. 2017). However, whether genetic  
125 relatedness plays a role in structuring the network at both the individual and community  
126 levels remain unknown. In particular, whether sharks benefit from associating with kin  
127 remains unknown as cooperation has not been proven and social foraging may not require  
128 associations with kin to improve predation success (Labourgade et al. 2020).

129 We aim to describe the social structure and to determine whether sharks had genuine  
130 social preferences (caused by active choice of individuals to interact) by controlling for non-  
131 social structural factors, including space use, time, phenotype, and individual gregariousness.  
132 We then tested whether the social structure at different scales can be explained by the genetic  
133 relatedness between individuals.

134

## 135 **MATERIAL AND METHODS**

### 136 **Field observations and data collection**

137 Between 2008 and 2010, observation surveys were conducted along approximately 10km  
138 of coastline of the Northern reef of Moorea Island (French Polynesia) (Figure 1). The surveys

139 consisted of 40 min dives at 7 sites along a 10 km portion of reef (total = 180 dives, site 1 =  
140 20, site 2 = 50, site 3 = 8, site 4 = 33, site 5 = 30, site 6 = 34 and site 7 = 7). Individual  
141 blacktip reef sharks were identified by photo-identification, using unique, lifelong colour-  
142 shape of the dorsal fin (Mourier et al. 2012).

143 Associations between individuals were defined using the "Gambit of the Group"  
144 (Whitehead and Dufault 1999) assuming that all individuals observed together are then  
145 considered as "associated". This approach is appropriate when individuals move between  
146 groups and direct interactions are difficult to observe, but where groups can be easily defined  
147 (Franks et al. 2010; Farine and Whitehead 2015). An experienced diver conducted a  
148 stationary visual census at each site monitored, moving and identifying sharks within a ~100  
149 m radius area (made possible by the high visibility conditions in these tropical waters). All  
150 individuals observed during a dive were considered as part of the same group if they were  
151 encountered within 10 min periods. We are confident that observed associations represented  
152 true grouping structure, because groups were spatio-temporally well-defined and sharks were  
153 engaged into specific social behaviour (e.g. following, parallel swimming or milling; Mourier  
154 et al. 2012). To avoid the potential for weak and non-relevant associations between pairs of  
155 individuals with very low number of sightings, we used a restrictive observation threshold to  
156 include only individuals observed more than the median number of sightings (median = 14;  
157 mean  $\pm$  sd = 14.92  $\pm$  8.04; Supplementary Figure S1). Thus, all individuals seen less than 15  
158 times were removed from the analyses to ensure that associations were estimated with high  
159 accuracy and precision.

160

### 161 **DNA sampling and laboratory procedures**

162 Shark fishing sessions using rod and reel and barbless hooks were conducted to obtain tissue  
163 samples for genetic analysis. Once hooked, sharks were brought alongside the boat where

164 they were inverted and placed in tonic immobility while biological data and tissue samples  
165 were collected. Each shark was identified by photo-identification of the dorsal fin, sexed and  
166 measured to the nearest centimeter (Mourier et al. 2012; Mourier, Mills, et al. 2013). Fishing  
167 sessions were conducted directly after underwater surveys to avoid perturbations of the  
168 experimental setup (Mourier et al. 2017) and to increase the chance of getting DNA samples  
169 from sharks that were part of the social network. Fishing effort was maintained until sharks  
170 failed to respond to the bait (generally <30 min and after catching 2-3 individuals). A fin clip  
171 was collected from the second dorsal fin or anal fin and samples were individually preserved  
172 in 95% ethanol and returned to the laboratory for genotyping (Mourier and Planes 2013).  
173 DNA was extracted using the QIAGEN DX Universal Tissue Sample DNA Extraction  
174 protocol. PCR amplification and the microsatellite loci used are described in detail in  
175 previous studies (Mourier and Planes 2013; Vignaud et al. 2013; Vignaud et al. 2014). The  
176 software MICROCHECKER (Van Oosterhout Cock et al. 2004) was used to test for null  
177 alleles and other genotyping errors.

178 We compared the suitability of seven pairwise relatedness estimators: five non-likelihood  
179 estimators (Queller and Goodnight 1989; Li et al. 1993; Ritland 1996; Lynch and Ritland  
180 1999; Wang 2002) and two maximum-likelihood estimators (Milligan 2003; Wang 2007) in  
181 the R package *related* (Pew et al. 2015) and determined that the triadic maximum-likelihood  
182 estimator (TrioML; Wang 2007) was best suited to our microsatellite panel (Supplementary  
183 materials, Supplementary Figure S2) as it showed the highest correlation (i.e. 0.831) with the  
184 true values and the smallest variation around the mean for every relationship (except for full-  
185 sibs). This analysis generates simulated individuals of known relatedness based on the  
186 observed allele frequencies and calculates the genetic relatedness using the different  
187 estimators. The correlation between observed and expected genetic relatedness was obtained

188 for each estimator, and the one with the highest correlation coefficient was selected for  
189 further analysis.

190

### 191 **Defining associations**

192 Using R package *asnipe* (Farine 2013), we calculated dyadic association strengths (i.e.  
193 associations among pairs of individuals) among photo-identified individual sharks seen in  
194 groups from the spatio-temporal co-occurrences, and the proportion of time two individuals  
195 were observed together at the same site given that at least one was observed, using the  
196 simple-ratio association index (SRI) (Cairns and Schwager 1987). The SRI is the  
197 recommended association index when calibration data are unavailable (Hoppitt and Farine  
198 2018).

199 To measure the diversity of associations, we calculated the social differentiation (S) in  
200 the network that is the estimated coefficient of variation (standard deviation divided by mean)  
201 of the true association indices. If the social differentiation of the network is 0, then  
202 relationships among members are completely homogeneous. Conversely, if the social  
203 differentiation is above 1.0, there is considerable diversity in the relationships between pairs  
204 of individuals within the network (Whitehead 2008). For our data, the standard error of S was  
205 generated by bootstrapping (1 000 replications).

206

### 207 **Potential structural factors of social associations**

208 We quantified five structural factors that could affect shark association patterns: spatial  
209 overlap, temporal overlap, gregariousness, and size and sex similarity for each pair of  
210 individuals. Genetic relatedness was not included as a structural factor as it will be tested  
211 independently when other factors are extracted.

212 For each individual, an encounter rate (i.e., no. sightings of individual at site, divided by  
213 no. sampling occasions at site) was calculated by site to define individual spatial utilization  
214 (Supplementary Figure S3). We then generated a Bray-Curtis similarity matrix of space use  
215 to construct a matrix of spatial overlap between individuals using R package “vegan” (Dixon  
216 2003).

217 Individuals using an area at the same time are more likely to be associated with each  
218 other. The study period corresponds to a total of 28 months between February 2008 and June  
219 2010. The temporal overlap was calculated as the custom SRI calculated on whether pairs  
220 were observed in the study area within sampling periods of 60 days.

221 Gregariousness was calculated following Whitehead and James's (2015) correction,  
222 where the gregariousness predictor between two individuals ( $a$  and  $b$ ) is the log of the sum of  
223 the association indices involving  $a$  (except the  $ab$  index) multiplied by the sum of those  
224 involving  $b$  (except the  $ba$  index):  $G_{ab} = \log(\Sigma SRI_a \Sigma SRI_b)$  where  $\Sigma SRI_a$  and  $\Sigma SRI_b$  are the  
225 sums of all the SRIs for individuals  $a$  and  $b$ , respectively.

226 Shark length was classified into size classes ranging from 1 to 6 (1: TL < 110 cm; 2:  
227 110-119 cm; 3: 120-129 cm; 4: 130-139 cm; 5: 140-150 cm; 6: TL > 150 cm). For sex and  
228 size similarity, we constructed a binary matrix in which elements  $a_{ij} = 1$  when individuals  $i$   
229 and  $j$  were of the same class and  $a_{ij} = 0$  otherwise (sex class, 1 if same sex, 0 if not; size class,  
230 1 if same size class, 0 if not).

231

### 232 **Influence of structural factors on social associations**

233 We quantified the contribution of all five structural factors in driving social patterns with  
234 a multiple regression quadratic assignment procedure (MRQAP) modified by Farine (2013)  
235 that enables null models built from pre-network data permutations to be used in conjunction  
236 with a MRQAP regression. This approach was shown to be more accurate than classic

237 MRQAP procedures (Farine 2017). We assessed possible linear relationships between the  
238 social associations and the structural factors using the SRI association matrix as the  
239 dependent variables and the matrices representing pairwise similarity of each of the five  
240 structural factors as independent variables. We used 20,000 permutations to build randomized  
241 distributions to compare with the empirical coefficient. The *P*-values were the proportion of  
242 the estimated coefficient regression which were smaller or greater than what would have been  
243 expected by chance. We used the *mrqap.custom.null* function from *asnipe* R package (Farine  
244 2013) to run MRQAP tests in R v. 3.3.0 (R Core Team 2019).

245

### 246 **Removing the effects of structural factors from associations**

247 We developed generalized affiliation indices (GAI, Whitehead and James 2015) to  
248 remove the effects of the significant structural factors from the associations and test the  
249 existence of true affiliations between dyads (i.e. active association preferences). For this, we  
250 fitted a binomial generalized linear model (GLM) with the unfolded SRI matrix as the  
251 dependent variable, and the significant structural factors selected from the MRQAP as  
252 independent variables. GAI represents the assortment of individuals not explained by the  
253 significant structural factors and corresponds to the deviance residuals of the model. The  
254 model was:  $SRI \sim TO + SO$ , where SRI is the association matrix, TO is the temporal overlap  
255 matrix and SO is the spatial overlap matrix (as only TO and SO were significant factors in the  
256 MRQAP, Table 1).

257

### 258 **Social preferences and null models**

259 We used a null model to test both for social preferences and the significance of the  
260 observed network modularity. We generated 20,000 randomized association and affiliation  
261 networks based on 25,000 data-stream permutations of the raw observation data with a

262 swapping algorithm (Bejder et al. 1998). We permuted the empirical group-by-individual  
263 matrix constraining the number of groups, individuals and occurrences (matrix dimension  
264 and fill), group size (row totals) and individual frequency of observation (column totals). To  
265 minimize the effect of initial values potentially correlated to the empirical data, we removed  
266 the first 5,000 randomized matrices. From the randomised group-by-individual matrix, we  
267 calculated a simple-ratio index association matrix, with which we built a generalized  
268 affiliation index using the same predictors selected via MRQAP for the empirical data. We  
269 used a modified version of R codes available from Machado et al. (2019) to build null models  
270 and to calculate SRI, GAI and modularity.

271 We compared the standard deviation (SD) of the observed simple-ratio index (SRI) and  
272 the SD of the observed generalized affiliation index (GAI) with the distribution of the SD of  
273 corresponding randomized SRI and GAI matrices generated by the null models detailed  
274 above. An observed SD significantly higher than the null expectation indicates the presence  
275 of preferred and avoided associations and affiliations. We also tested for strongly connected  
276 social communities by comparing the empirical modularity (Q) (Newman 2006) of SRI and  
277 positive GAI matrices with that of the randomized matrices. Empirical SD and Q values were  
278 considered statistically significant if they fell outside the 95% confidence interval of their  
279 randomized distributions.

280

## 281 **Genetic relatedness, social structure and sex differences**

282 To assess whether relatedness differs for same-sex dyads, we constructed three binary  
283 matrices (0,1), each encoding the presence of a certain dyad type (female–female, male–male  
284 or female–male). We then tested for a correlation with the relatedness matrix using three  
285 Mantel tests (20,000 permutations), via the vegan R package (Dixon 2003).



286 For each type of dyad (female–female, male–male or female–male), we then tested for a  
287 correlation between the SRI and GAI matrices and the pairwise genetic relatedness among  
288 sharks using Mantel tests and compared the test statistics to those of the 20,000 permuted  
289 networks.

290 We also compared the gregariousness of individual sharks between the sexes. For this,  
291 we used two measures of gregariousness: node degree (or binary degree) which is the number  
292 of direct neighbours each individual is connected to in the network and node strength (or  
293 weighted degree) that is the sum of associations of an individual. We then used these network  
294 metrics in order to determine whether males and females differed in their gregariousness. We  
295 constructed generalized linear models (GLMs) to test how sex affected the observed network  
296 degree (degree ~ sex) and strength (strength ~ sex). We ran these same models with  
297 randomized permutations of the network data to evaluate statistical significance (Farine and  
298 Whitehead 2015; Farine 2017).

299 To determine whether individuals within groups (size class and communities) were more  
300 or less closely related than expected, we compared the observed values for each group against  
301 a distribution of expected relatedness values generated by randomly shuffling individuals  
302 between groups for 1000 permutations, where size was kept constant, using the R  
303 package *related* (Pew et al. 2015). If the observed mean relatedness was greater than that of  
304 the permuted data, then the null hypothesis which predicted that the mean within-community  
305 relatedness is random, was rejected.

306 If only a few closely related individuals were present, then it is possible that their within-  
307 community overabundance compared to between social communities might not be detected  
308 using mean coefficient of relatedness (Buston et al. 2009). In turn, we verified whether the  
309 proportion of closely related pairs was higher within than between social communities using  
310 a chi-squared test following the same approach as the preceding analysis with mean

311 relatedness. We compared the  $\chi^2$  statistics of the observed difference in proportions of  
312 relatedness values above a certain threshold between within- and between-communities to  
313 that of expected relatedness values generated by randomly shuffled individuals between  
314 community groups for 1000 permutations and keeping size constant. We tested with a  
315 threshold relatedness value of 0.25 corresponding to the theoretical relatedness of half-sibs.  
316

## 317 **RESULTS**

### 318 **Data summary**

319 Of 241 catalogued sharks (150 males, 91 females; Mourier et al. 2012), 49 (36 males, 13  
320 females) were observed on more than 15 occasions (mean resightings =  $14.92 \pm 8.04$  SD,  
321 Supplementary Figure S1). A total of 225 adult sharks were genotyped from the studied area.  
322 From the 49 sharks included in our social network analyse, 87% (43) were genotyped.  
323 Therefore, 43 individuals (30 males, 13 females) were included in the remaining analyses.  
324 This resulted in 156 observed groups (mean group size =  $8.60 \pm 4.92$  SD). From the 17  
325 microsatellite markers taken from our previous study (Mourier and Planes 2013), the  
326 presence of null alleles was detected at Cli12 which was then removed from our dataset for  
327 further genetic analyses. We conducted the genetic analyses with 16 loci (Supplementary  
328 Table S1).

329

### 330 **Social structure**

331 The social differentiation of the population was higher than 1 ( $S \pm SE = 1.474 \pm 0.037$ ),  
332 revealing a diverse range of associations and a well-differentiated society. The most  
333 significant predictors of shark associations were the temporal and spatial overlaps, which  
334 explained 94% of the total variance in SRI (MRQAP results, Table 1).

335 We rejected the null hypothesis that sharks associate randomly, as the observed SD of  
336 SRI was higher than the random SD. When GAI removed the influence of temporal and  
337 spatial overlaps from SRI, we also rejected the null hypothesis of random affiliations (Figure  
338 2a) demonstrating the presence of preferred social affiliations. At the population level, the  
339 modularity (Q) of the association (SRI) and affiliation (GAI) networks were higher than  
340 expected by chance (Figure 2b). While the three communities from the SRI network had  
341 distinct use of space, some communities from the GAI network had similar spatial  
342 distributions (e.g., communities yellow and purple, Figure 2c).

343

#### 344 **Crossing of genetic relatedness and association patterns**

345 When testing for kin-biased relatedness, adult male-male (MM), female-female (FF) and  
346 male-female (MF) dyads did not have clear higher or lower genetic relatedness (Mantel test:  
347 MM,  $r = -0.012$ ,  $n = 31$ ,  $P = 0.061$ ; FF,  $r = -0.019$ ,  $n = 12$ ,  $P = 0.685$ ; MF,  $r = 0.023$ ,  $n = 43$ ,  $P$   
348  $= 0.259$ ). In addition, mean genetic relatedness was not higher within than between size  
349 classes (mean  $r = 0.043$ , random 95% CI = 0.058-0.065,  $P = 0.88$ ; Supplementary materials,  
350 Table S2). While individuals were relatively spatially clustered, genetic relatedness appeared  
351 much more homogeneously distributed across individuals and space (Mantel test between  
352 matrices of spatial overlap and genetic relatedness:  $r = 0.011$ ,  $n = 43$ ,  $P = 0.351$ ;  
353 Supplementary Figure S4).

354 Average pairwise relatedness among individuals was  $0.062 \pm 0.001$  (mean  $\pm$  SE) ranging  
355 from 0 to 0.774. Associations were only significantly positively correlated with genetic  
356 relatedness between males (Mantel test:  $r = 0.103$ ,  $P = 0.026$ ) but no significant correlation  
357 was found between GAI and genetic relatedness for any sex dyad (Table 2). Males were  
358 generally more gregarious than females, as they significantly interacted with more

359 individuals (higher degree) but did not have stronger relationships (higher strength) (Table 3,  
360 Figure 3).

361 Within-community relatedness estimate was inferred for each community and index (SRI  
362 and GAI, Table 4). Relatedness within all communities was not higher than expected if  
363 communities were randomly organized (SRI network: within mean  $\pm$  SE =  $0.071 \pm 0.005$ ,  
364 between mean  $\pm$  SE =  $0.058 \pm 0.003$ ,  $P = 0.093$ ; GAI network: within mean  $\pm$  SE =  $0.060 \pm$   
365  $0.005$ , between mean  $\pm$  SE =  $0.063 \pm 0.005$ ,  $P = 0.722$ ) (Table 4).

366 Among the 903 potential pairs, 39 (4.31%) had values higher than 0.25. In addition, there  
367 was no higher proportion of close relatives within than between communities for relatedness  
368 value  $r > 0.25$  for SRI (chi-squared test:  $n_{\text{within/between}} = 17/22$ , d.f. = 1,  $\chi^2 = 0.928$ ,  $P = 0.119$ )  
369 and GAI (chi-squared test:  $n_{\text{within/between}} = 8/35$ , d.f. = 1,  $\chi^2 = 0.386$ ,  $P = 0.326$ ) (Figure 4).

370 Together, these results suggest that no differences exist for within- and between-  
371 community membership with respect to the genetic relatedness of their members.

372

## 373 **DISCUSSION**

374 We found a fine-scale social structure in blacktip reef sharks in Moorea. Taking into  
375 account the confounding effects of 5 structural variables (spatial and temporal overlap,  
376 gregariousness, size and sex), which are known to influence association patterns (e.g. Godde  
377 et al. 2013; Diaz-Aguirre et al. 2019; Machado et al. 2019; Perryman et al. 2019), we found  
378 that blacktip reef sharks in Moorea had both preferred associations and affiliations. However,  
379 social proximity was not predicted by the genetic relatedness between sharks both at the  
380 association, affiliation and community levels. At the dyad level, only male-male associations,  
381 but not affiliations, were slightly correlated with genetic relatedness. In addition, individuals  
382 had low probabilities of interacting with a close-kin which could explain the lack of influence  
383 of kinship in structuring the social network in this population. These results therefore suggest

384 that genetic relatedness does not drive the structure of the social network in this shark  
385 population.

386 Compared to previous work conducted on this population (Mourier et al. 2012) which  
387 only analysed social structure through associations among sharks, the present study also  
388 considered the effects of two structural variables to estimate affiliation indices. Affiliations  
389 are an increasingly used method to investigate the true social interactions experienced by  
390 animals (Whitehead and James 2015), in particular by considering the strong correlation that  
391 can exist between space use overlap and association indices in a variety of taxa (e.g., Mourier  
392 et al. 2012; Carter et al. 2013; Best et al. 2014). In our study, the network built from  
393 associations using the simple ratio index (SRI) was composed of three main communities  
394 relatively spatially separated and only low overlap (Figure 2). When removing the influence  
395 of spatial and temporal overlap from association patterns, the network built from the  
396 generalized affiliation indices (GAI) revealed five communities that were less spatially  
397 separated. This means that associations between sharks were the result of more than just  
398 similarities in habitat use or overlaps in time, indicating that individuals actively chose to  
399 group with preferred social partners. The differences between the three SRI communities in  
400 the present study and the four communities found in Mourier et al. (2012) can be due to the  
401 high threshold we used that may highlight only strong relationships and the use of SRI instead  
402 of HWI. To our knowledge, only one study on elasmobranchs has investigated social  
403 structure using GAI, demonstrating that manta rays also preferred affiliations (Perryman et al.  
404 2019). Individuals' site preferences and being present in the study at the same time was a  
405 strong predictor of association between pairs. Site fidelity is often a prerequisite for sociality,  
406 creating an environment for social relationships to develop and the emergence of social  
407 preferences. However, the presence of preferred social affiliations demonstrates that sharks  
408 show active social preferences that do not rely on preferences for sites and periods. Our

409 study confirms that the observed shark social structure resembles that of a fission-fusion  
410 society characterized by an open and fluid social structure, long-term social recognition and a  
411 high number of potential affiliates, which is flexible depending on environmental  
412 conditions.

413         Among the adult sharks in our population, there was a generally low level of  
414 relatedness, and only a small number of dyads had close familial relatives. Interactions  
415 frequently occurred between distant kin and non-kin. This implies that the social structure  
416 among adult blacktip reef sharks was not based on associations between close kin as  
417 demonstrated by our analyses which compared association and affiliation patterns with  
418 genetic relatedness among dyads at the pairwise or community levels. This is confirmed by  
419 the low number of close kin available for each shark in the population (< 6 % pairs with  $r >$   
420 0.25), thereby limiting the probability of an individual to encounter a family member and to  
421 develop strong associations with them. The lack of genetic relatedness structure within size  
422 classes and the lack of decreasing genetic relatedness as sharks grow also suggests that  
423 juveniles are unlikely to leave their nursery ground with other kin. If young sharks were  
424 developing and maintaining strong bonds with their littermates throughout their entire life,  
425 we would have expected to find high mean relatedness and high proportion of close kin  
426 across all size classes. The low relatedness we found within each size class indicates that  
427 sharks favoured associations with non-kin. These results can be explained in part by the life  
428 history and life cycle of blacktip reef sharks. In fact, in contrast to most social animals that  
429 show some forms of family structure and parental care, female reef-associated sharks such as  
430 blacktip reef shark, leave their pups in their nursery after birth (Mourier and Planes 2013).  
431 Moreover, litter size in this species does not exceed five pups (Mourier, Mills, et al. 2013)  
432 while litter size in Moorea was limited to a maximum of two pups (Mourier and Planes  
433 2013). In addition, blacktip reef sharks follow a yearly breeding cycle with females giving

434 birth every year and potentially being fertilized by multiple males within or across years,  
435 which increases the probability of having maternal and paternal half-siblings. Our ongoing  
436 long-term nursery monitoring shows that capture probabilities rapidly decline after March  
437 (unpublished data), 2 to 3 months after parturition, which suggests a dramatic mortality rate  
438 within the nursery areas during the first months of life (i.e. survival rate expected to be  
439 inferior to 50% during the first year of life). Together with a small litter size and absence of  
440 parental care, this high mortality rate, which is common in many shark species, is likely to  
441 limit the opportunity to find family members and develop strong affiliations with close  
442 relatives at adulthood. Even in nurseries, juvenile lemon sharks did not clearly assort by  
443 relatedness (Guttridge et al. 2011), even if the probability of finding a relative is higher for  
444 this species with a larger litter size. When juvenile sharks grow, they progressively explore  
445 their environment and increase their home range (Chin A et al. 2013), creating an opportunity  
446 to find related individuals such as parents or maternal half-siblings from previous  
447 reproductive seasons. At adulthood, our results confirm that preferred associations and  
448 affiliations are not driven by genetic relatedness as sharks are associating with conspecifics of  
449 variable genetic distances. This suggests that sharks might not have the ability for kin  
450 recognition simply based on visual or olfactory cues and that kin-based preferred associations  
451 and affiliations may only develop within nursery areas from increased familiarity with  
452 littermates, or that they are not seeking for associations with related individuals. Through  
453 investigation of social groups of spotted eagle rays *Aetobatus narinari* in Florida, Newby et  
454 al. (2014) found no kin-structure in the social organization, although the analysis was based  
455 on group composition rather than quantitatively inferred using association indices. However,  
456 our results revealed that males slightly preferred to associate with other related males but this  
457 tendency was not confirmed for affiliations (accounting for spatial and temporal structural  
458 components). This suggests that genetic relatedness among males was spatially structured

459 and that males may disperse less than females. The lack of differences in relatedness between  
460 males and females suggests that the risk of inbreeding might be low if these interactions  
461 represented potential mating pairs and not only social bonds.

462

463 The emerging literature suggests that genetic structure of animal social networks can  
464 vary dramatically, from highly cohesive kin-based groups like African elephants (*Loxodonta*  
465 *africana*) (Archie et al. 2006) or spotted hyenas (*Crocuta crocuta*) (Holekamp et al. 2012), to  
466 groups with moderate levels of genetic relatedness due to limited dispersal like the Galápagos  
467 sea lion (*Zalophus wollebaeki*) (Wolf and Trillmich 2008) or the eastern grey kangaroo  
468 (*Macropus giganteus*) (Best et al. 2014), or to groups with little to no genetic relatedness like  
469 guppies (*Poecilia reticulata*) (Croft et al. 2012), the common raccoon (*Procyon lotor*)  
470 (Hirsch et al. 2013) or migratory golden-crowned sparrows (*Zonotrichia atricapilla*)  
471 (Arnberg et al. 2015). These patterns of variation provide opportunities to explore how  
472 ecological factors interact with kinship to produce variations in the structures of animal  
473 societies. Kinship is expected to promote the evolution of cooperation and sociality in  
474 animals (Hamilton 1964). However, our understanding of the evolution of sociality results to  
475 a great extent from the study of closed societies, in which interactions mainly involve  
476 relatives and can hence be explained by kin selection (Hamilton 1964). However, the kin  
477 selection theory has recently been challenged by results from studies showing that fitness  
478 benefit can emerge in social groups composed mainly of non-relatives (e.g., Cameron et al.  
479 2009; Riehl 2011; Wilkinson et al. 2016). In many natural populations, dispersal tends to be  
480 limited, favouring local competition between neighbours and the emergence of a social  
481 component, whether it be selfish, aggressive, cooperative or altruistic (Lehmann and Rousset  
482 2010). But how social behaviours translate into fitness costs and benefits depends  
483 considerably on life-history features, as well as on local demographic and ecological



484 conditions. The fission – fusion social dynamics lead to unstable group membership, and  
485 dispersal and occasional recruitment of unrelated individuals lead to low average relatedness  
486 in groups. Then under such conditions, selection is not expected to favour kin recognition  
487 mechanisms based on familiarity alone.

488 Therefore, contrary to the kin selection hypothesis which predicts stronger associations  
489 among kin, sharks tended to assort randomly according to relatedness. As kinship does not  
490 explain the strength of social affiliations in blacktip reef sharks, the question remains as to  
491 how and why sharks form preferred associations and affiliations organised in social  
492 communities (Mourier et al. 2012). Although cooperation has been mainly explained in the  
493 context of kin selection, there might be potential benefits of non-kin sociality in blacktip reef  
494 sharks such as for other animals in which association with non-kin emerges via reciprocal  
495 altruism (Carter and Wilkinson 2013; Wilkinson et al. 2016). While evidence of shark  
496 cooperation has not been confirmed, gregarious behaviour can have several benefits in sharks  
497 (Jacoby et al. 2012), including increased foraging success by hunting in groups (Weideli et al.  
498 2015; Mourier et al. 2016), protection from predators (Mourier, Planes, et al. 2013), or  
499 increased tolerance relationships and reduced aggression rate (Brena et al. 2018).

500 Heterospecific foraging associations have been found to develop and increase predation  
501 success (Labourgade et al. 2020), which suggests that sharks can benefit from hunting  
502 associations without associating with kin. These benefits do not necessarily imply kin  
503 selection and can simply build on the development of familiarity from repeated interactions.

504 Social structure in reef sharks can arise from multiple simple ecological factors such as the  
505 distribution of resources in space and time leading to aggregations of individuals even in the  
506 absence of benefits of direct social affiliation (Ramos-Fernández et al. 2006) or mitigation of  
507 the cost of unnecessary aggression when competing for resources mediated by individual  
508 recognition (Brena et al. 2018). Regardless of the exact cause of social preferences in reef

509 sharks, the absence of kinship as an important factor in structuring association patterns  
510 suggests that there are important benefits of sociality in sharks that we still need to uncover.  
511 With an increasing use of social network analyses applied to shark populations (Mourier et al.  
512 2018), future work on social networks and genetic relatedness in different populations or  
513 species is necessary to confirm our results and to improve our understanding of population  
514 dynamics in sharks and the evolution of sociality.

515

## 516 **SUPPLEMENTARY MATERIAL**

517 Supplementary information including two tables and four figures can be found online.

518

519

## 520 **REFERENCES**

- 521 Archie EA, Moss CJ, Alberts SC. 2006. The ties that bind: genetic relatedness predicts the  
522 fission and fusion of social groups in wild African elephants. *Proc R Soc Lond B Biol Sci.*  
523 273(1586):513–522. doi:10.1098/rspb.2005.3361.
- 524 Arnberg NN, Shizuka D, Chaine AS, Lyon BE. 2015. Social network structure in wintering  
525 golden-crowned sparrows is not correlated with kinship. *Mol Ecol.* 24(19):5034–5044.
- 526 Bejder L, Fletcher D, Bräger S. 1998. A method for testing association patterns of social  
527 animals. *Anim Behav.* 56(3):719–725. doi:10.1006/anbe.1998.0802.
- 528 Best EC, Dwyer RG, Seddon JM, Goldizen AW. 2014. Associations are more strongly  
529 correlated with space use than kinship in female eastern grey kangaroos. *Anim Behav.* 89:1–  
530 10. doi:10.1016/j.anbehav.2013.12.011.
- 531 Brena PF, Mourier J, Planes S, Clua EE. 2018. Concede or clash? Solitary sharks competing  
532 for food assess rivals to decide. *Proc R Soc B.* 285(1875):20180006.  
533 doi:10.1098/rspb.2018.0006.
- 534 Brown GE, Brown JA. 1993. Social dynamics in salmonid fishes: do kin make better  
535 neighbours? *Anim Behav.* 45(5):863–871. doi:10.1006/anbe.1993.1107.
- 536 Buston PM, Fauvelot C, Wong MYL, Planes S. 2009. Genetic relatedness in groups of the  
537 humbug damselfish *Dascyllus aruanus*: small, similar-sized individuals may be close kin.  
538 *Mol Ecol.* 18(22):4707–4715. doi:10.1111/j.1365-294X.2009.04383.x.
- 539 Cairns SJ, Schwager SJ. 1987. A comparison of association indices. *Anim Behav.*  
540 35(5):1454–1469. doi:10.1016/S0003-3472(87)80018-0.

- 541 Cameron EZ, Setsaas TH, Linklater WL. 2009. Social bonds between unrelated females  
542 increase reproductive success in feral horses. *Proc Natl Acad Sci.* 106(33):13850–13853.  
543 doi:10.1073/pnas.0900639106.
- 544 Carter GG, Wilkinson GS. 2013. Food sharing in vampire bats: reciprocal help predicts  
545 donations more than relatedness or harassment. *Proc R Soc B Biol Sci.* 280(1753):20122573.  
546 doi:10.1098/rspb.2012.2573.
- 547 Carter KD, Seddon JM, Frère CH, Carter JK, Goldizen AW. 2013. Fission–fusion dynamics  
548 in wild giraffes may be driven by kinship, spatial overlap and individual social preferences.  
549 *Anim Behav.* 85(2):385–394. doi:10.1016/j.anbehav.2012.11.011.
- 550 Chapman DD, Babcock EA, Gruber SH, Dibattista JD, Franks BR, Kessel SA, Guttridge T,  
551 Pritchard EK, Feldheim KA. 2009. Long-term natal site-fidelity by immature lemon sharks  
552 (*Negaprion brevirostris*) at a subtropical island. *Mol Ecol.* 18(16):3500–3507.  
553 doi:10.1111/j.1365-294X.2009.04289.x.
- 554 Chin A, Heupel MR, Simpfendorfer CA, Tobin AJ. 2013. Ontogenetic movements of  
555 juvenile blacktip reef sharks: evidence of dispersal and connectivity between coastal habitats  
556 and coral reefs. *Aquat Conserv Mar Freshw Ecosyst.* 23(3):468–474. doi:10.1002/aqc.2349.
- 557 Clutton-Brock T. 2009. Cooperation between non-kin in animal societies. *Nature.*  
558 462(7269):51–57. doi:10.1038/nature08366.
- 559 Croft DP, Hamilton PB, Darden SK, Jacoby DMP, James R, Bettaney EM, Tyler CR. 2012.  
560 The role of relatedness in structuring the social network of a wild guppy population.  
561 *Oecologia.* 170(4):955–963. doi:10.1007/s00442-012-2379-8.
- 562 Dadda M, Pilastro A, Bisazza A. 2005. Male sexual harassment and female schooling  
563 behaviour in the eastern mosquitofish. *Anim Behav.* 70(2):463–471.  
564 doi:10.1016/j.anbehav.2004.12.010.
- 565 Diaz-Aguirre F, Parra GJ, Passadore C, Möller L. 2019. Genetic relatedness delineates the  
566 social structure of southern Australian bottlenose dolphins. *Behav Ecol.* 30(4):948–959.  
567 doi:10.1093/beheco/arz033.
- 568 Dixon P. 2003. VEGAN, a package of R functions for community ecology. *J Veg Sci.*  
569 14(6):927–930. doi:10.1111/j.1654-1103.2003.tb02228.x.
- 570 Farine DR. 2013. Animal social network inference and permutations for ecologists in R using  
571 *asnipe*. *Methods Ecol Evol.* 4(12):1187–1194. doi:10.1111/2041-210X.12121.
- 572 Farine DR. 2017. A guide to null models for animal social network analysis. *Methods Ecol*  
573 *Evol.*:n/a-n/a. doi:10.1111/2041-210X.12772.
- 574 Farine DR, Whitehead H. 2015. Constructing, conducting and interpreting animal social  
575 network analysis. *J Anim Ecol.* 84(5):1144–1163. doi:10.1111/1365-2656.12418.
- 576 Feldheim KA, Gruber SH, DiBattista JD, Babcock EA, Kessel ST, Hendry AP, Pritchard EK,  
577 Ashley MV, Chapman DD. 2014. Two decades of genetic profiling yields first evidence of  
578 natal philopatry and long-term fidelity to parturition sites in sharks. *Mol Ecol.* 23(1):110–  
579 117. doi:10.1111/mec.12583.

- 580 Franks DW, Ruxton GD, James R. 2010. Sampling Animal Association Networks with the  
581 Gambit of the Group. *Behav Ecol Sociobiol.* 64(3):493–503.
- 582 Godde S, Humbert L, Côté SD, Réale D, Whitehead H. 2013. Correcting for the impact of  
583 gregariousness in social network analyses. *Anim Behav.* 85(3):553–558.  
584 doi:10.1016/j.anbehav.2012.12.010.
- 585 Guttridge TL, Dijk S van, Stamhuis EJ, Krause J, Gruber SH, Brown C. 2013. Social learning  
586 in juvenile lemon sharks, *Negaprion brevirostris*. *Anim Cogn.* 16(1):55–64.  
587 doi:10.1007/s10071-012-0550-6.
- 588 Guttridge TL, Gruber SH, DiBattista JD, Feldheim KA, Croft DP, Krause S, Krause J. 2011.  
589 Assortative interactions and leadership in a free-ranging population of juvenile lemon shark  
590 *Negaprion brevirostris*. *Mar Ecol Prog Ser.* 423:235–245. doi:10.3354/meps08929.
- 591 Guttridge TL, Gruber SH, Gledhill KS, Croft DP, Sims DW, Krause J. 2009. Social  
592 preferences of juvenile lemon sharks, *Negaprion brevirostris*. *Anim Behav.* 78(2):543–548.  
593 doi:10.1016/j.anbehav.2009.06.009.
- 594 Hamilton WD. 1964. The genetical evolution of social behaviour. I. *J Theor Biol.* 7(1):1–16.  
595 doi:10.1016/0022-5193(64)90038-4.
- 596 Hatchwell Ben J. 2010. Cryptic Kin Selection: Kin Structure in Vertebrate Populations and  
597 Opportunities for Kin-Directed Cooperation. *Ethology.* 116(3):203–216. doi:10.1111/j.1439-  
598 0310.2009.01732.x.
- 599 Hirsch BT, Prange S, Hauver SA, Gehrt SD. 2013. Genetic relatedness does not predict  
600 racoon social network structure. *Anim Behav.* 85(2):463–470.  
601 doi:10.1016/j.anbehav.2012.12.011.
- 602 Holekamp KE, Smith JE, Strelhoff CC, Van Horn RC, Watts HE. 2012. Society, demography  
603 and genetic structure in the spotted hyena. *Mol Ecol.* 21(3):613–632. doi:10.1111/j.1365-  
604 294X.2011.05240.x.
- 605 Hoppitt WJE, Farine DR. 2018. Association indices for quantifying social relationships: how  
606 to deal with missing observations of individuals or groups. *Anim Behav.* 136:227–238.  
607 doi:10.1016/j.anbehav.2017.08.029.
- 608 Jacoby DMP, Busawon DS, Sims DW. 2010. Sex and social networking: the influence of  
609 male presence on social structure of female shark groups. *Behav Ecol.* 21(4).  
610 doi:10.1093/beheco/arq061. [accessed 2017 Jan 4].  
611 <http://beheco.oxfordjournals.org/content/early/2010/05/09/beheco.arq061>.
- 612 Jacoby DMP, Croft DP, Sims DW. 2012. Social behaviour in sharks and rays: analysis,  
613 patterns and implications for conservation. *Fish Fish.* 13(4):399–417. doi:10.1111/j.1467-  
614 2979.2011.00436.x.
- 615 Jacoby DMP, Papastamatiou YP, Freeman R. 2016. Inferring animal social networks and  
616 leadership: applications for passive monitoring arrays. *J R Soc Interface.* 13(124):20160676.  
617 doi:10.1098/rsif.2016.0676.

- 618 Kerth G, Perony N, Schweitzer F. 2011. Bats are able to maintain long-term social  
619 relationships despite the high fission–fusion dynamics of their groups. *Proc R Soc Lond B*  
620 *Biol Sci.* 278(1719):2761–2767. doi:10.1098/rspb.2010.2718.
- 621 Krause J, Ruxton GD. 2002. *Living in Groups*. OUP Oxford.
- 622 Labourgade P, Ballesta L, Huveneers C, Papastamatiou Y, Mourier J. 2020. Heterospecific  
623 foraging associations between reef-associated sharks: first evidence of kleptoparasitism in  
624 sharks. *Ecology*.
- 625 Landeau L, Terborgh J. 1986. Oddity and the ‘confusion effect’ in predation. *Anim Behav.*  
626 34(5):1372–1380. doi:10.1016/S0003-3472(86)80208-1.
- 627 Lehmann L, Rousset F. 2010. How life history and demography promote or inhibit the  
628 evolution of helping behaviours. *Philos Trans R Soc Lond B Biol Sci.* 365(1553):2599–2617.  
629 doi:10.1098/rstb.2010.0138.
- 630 Li CC, Weeks DE, Chakravarti A. 1993. Similarity of DNA fingerprints due to chance and  
631 relatedness. *Hum Hered.* 43(1):45–52.
- 632 Lynch M, Ritland K. 1999. Estimation of Pairwise Relatedness With Molecular Markers.  
633 *Genetics.* 152:1753–1766.
- 634 Machado AMS, Cantor M, Costa APB, Righetti BPH, Bezamat C, Valle-Pereira JVS,  
635 Simões-Lopes PC, Castilho PV, Daura-Jorge FG. 2019. Homophily around specialized  
636 foraging underlies dolphin social preferences. *Biol Lett.* 15(4):20180909.  
637 doi:10.1098/rsbl.2018.0909.
- 638 Mann J, Stanton MA, Patterson EM, Bienenstock EJ, Singh LO. 2012. Social networks reveal  
639 cultural behaviour in tool-using dolphins. *Nat Commun.* 3:980. doi:10.1038/ncomms1983.
- 640 Milinski M. 1987. TIT FOR TAT in sticklebacks and the evolution of cooperation. *Nature.*  
641 325(6103):433–435. doi:10.1038/325433a0.
- 642 Milligan BG. 2003. Maximum-Likelihood Estimation of Relatedness. *Genetics.*  
643 163(3):1153–1167.
- 644 Mourier J, Brown C, Planes S. 2017. Learning and robustness to catch-and-release fishing in  
645 a shark social network. *Biol Lett.* 13(3):20160824. doi:10.1098/rsbl.2016.0824.
- 646 Mourier J, Lédée EJI, Guttridge TL, Jacoby DMP. 2018. Network analysis and theory in  
647 shark ecology - methods and applications. In: *Shark Research: Emerging Technologies and*  
648 *Application for the Study of Shark Biology*. Carrier J, Heithaus M and Simpfendorfer C.  
649 CRC Press. p. 337–356.
- 650 Mourier J, Maynard J, Parravicini V, Ballesta L, Clua E, Domeier ML, Planes S. 2016.  
651 Extreme Inverted Trophic Pyramid of Reef Sharks Supported by Spawning Groupers. *Curr*  
652 *Biol.* 26(15):2011–2016. doi:10.1016/j.cub.2016.05.058.
- 653 Mourier J, Mills SC, Planes S. 2013. Population structure, spatial distribution and life-history  
654 traits of blacktip reef sharks *Carcharhinus melanopterus*. *J Fish Biol.* 82(3):979–993.  
655 doi:10.1111/jfb.12039.

- 656 Mourier J, Planes S. 2013. Direct genetic evidence for reproductive philopatry and associated  
657 fine-scale migrations in female blacktip reef sharks (*Carcharhinus melanopterus*) in French  
658 Polynesia. *Mol Ecol*. 22(1):201–214. doi:10.1111/mec.12103.
- 659 Mourier J, Planes S, Buray N. 2013. Trophic interactions at the top of the coral reef food  
660 chain. *Coral Reefs*. 32(1):285–285. doi:10.1007/s00338-012-0976-y.
- 661 Mourier J, Vercelloni J, Planes S. 2012. Evidence of social communities in a spatially  
662 structured network of a free-ranging shark species. *Anim Behav*. 83(2):389–401.  
663 doi:10.1016/j.anbehav.2011.11.008.
- 664 Newby J, Darden T, Bassos-Hull K, Shedlock AM. 2014. Kin structure and social  
665 organization in the spotted eagle ray, *Aetobatus narinari*, off coastal Sarasota, FL. *Environ*  
666 *Biol Fishes*. 97(9):1057–1065. doi:10.1007/s10641-014-0289-9.
- 667 Newman MEJ. 2006. Finding community structure in networks using the eigenvectors of  
668 matrices. *Phys Rev E*. 74(3):036104. doi:10.1103/PhysRevE.74.036104.
- 669 Olsén KH, JäUrvi T. Effects of kinship on aggression and RNA content in juvenile Arctic  
670 charr. *J Fish Biol*. 51(2):422–435. doi:10.1111/j.1095-8649.1997.tb01676.x.
- 671 Papastamatiou YP, Lowe CG, Caselle JE, Friedlander AM. 2009. Scale-dependent effects of  
672 habitat on movements and path structure of reef sharks at a predator-dominated atoll.  
673 *Ecology*. 90(4):996–1008. doi:10.1890/08-0491.1.
- 674 Perryman RJY, Venables SK, Tapilatu RF, Marshall AD, Brown C, Franks DW. 2019. Social  
675 preferences and network structure in a population of reef manta rays. *Behav Ecol Sociobiol*.  
676 73(8):114. doi:10.1007/s00265-019-2720-x.
- 677 Pew J, Muir PH, Wang J, Frasier TR. 2015. related: an R package for analysing pairwise  
678 relatedness from codominant molecular markers. *Mol Ecol Resour*. 15(3):557–561.  
679 doi:10.1111/1755-0998.12323.
- 680 Queller DC, Goodnight KF. 1989. Estimating Relatedness Using Genetic Markers. *Evolution*.  
681 43(2):258–275. doi:10.1111/j.1558-5646.1989.tb04226.x.
- 682 R Core Team. 2015. R: a language and environment for statistical computing. Vienna,  
683 Austria: R Computing Foundation for Science.
- 684 Ramos-Fernández G, Boyer D, Gómez VP. 2006. A complex social structure with fission–  
685 fusion properties can emerge from a simple foraging model. *Behav Ecol Sociobiol*.  
686 60(4):536–549. doi:10.1007/s00265-006-0197-x.
- 687 Reisinger RR, Beukes (née Janse van Rensburg) C, Hoelzel AR, de Bruyn PJN. 2017.  
688 Kinship and association in a highly social apex predator population, killer whales at Marion  
689 Island. *Behav Ecol*. 28(3):750–759. doi:10.1093/beheco/axx034.
- 690 Riehl C. 2011. Living with strangers: direct benefits favour non-kin cooperation in a  
691 communally nesting bird. *Proc R Soc Lond B Biol Sci*. 278(1712):1728–1735.  
692 doi:10.1098/rspb.2010.1752.



- 693 Ritland K. 1996. Estimators for pairwise relatedness and individual inbreeding coefficients.  
694 *Genet Res.* 67(2):175–185. doi:10.1017/S0016672300033620.
- 695 Snijders L, Blumstein DT, Stanley CR, Franks DW. 2017. Animal Social Network Theory  
696 Can Help Wildlife Conservation. *Trends Ecol Evol.* 32(8):567–577.  
697 doi:10.1016/j.tree.2017.05.005.
- 698 Van Oosterhout Cock, Hutchinson William F., Wills Derek P. M., Shipley Peter. 2004.  
699 micro-checker: software for identifying and correcting genotyping errors in microsatellite  
700 data. *Mol Ecol Notes.* 4(3):535–538. doi:10.1111/j.1471-8286.2004.00684.x.
- 701 Vignaud T, Clua E, Mourier J, Maynard J, Planes S. 2013. Microsatellite Analyses of  
702 Blacktip Reef Sharks ( *Carcharhinus melanopterus* ) in a Fragmented Environment Show  
703 Structured Clusters. *PLOS ONE.* 8(4):e61067. doi:10.1371/journal.pone.0061067.
- 704 Vignaud TM, Mourier J, Maynard JA, Leblois R, Spaet JLY, Clua E, Neglia V, Planes S.  
705 2014. Blacktip reef sharks, *Carcharhinus melanopterus*, have high genetic structure and  
706 varying demographic histories in their Indo-Pacific range. *Mol Ecol.* 23(21):5193–5207.  
707 doi:10.1111/mec.12936.
- 708 Wang J. 2002. An Estimator for Pairwise Relatedness Using Molecular Markers. *Genetics.*  
709 160(3):1203–1215.
- 710 Wang J. 2007. Triadic IBD coefficients and applications to estimating pairwise relatedness.  
711 *Genet Res.* 89(3):135–153. doi:10.1017/S0016672307008798.
- 712 Weideli OC, Mourier J, Planes S. 2015. A massive surgeonfish aggregation creates a unique  
713 opportunity for reef sharks. *Coral Reefs.* 34(3):835–835. doi:10.1007/s00338-015-1290-2.
- 714 Whitehead H. 2008. *Analyzing Animal Societies: Quantitative Methods for Vertebrate Social*  
715 *Analysis.* Chicago: University of Chicago Press.
- 716 Whitehead H, Dufault S. 1999. Techniques for Analyzing Vertebrate Social Structure Using  
717 Identified Individuals: Review and Recommendations. In: Slater PJB, Rosenblat JS, Snowden  
718 CT, Roper TJ, editors. *Advances in the Study of Behavior.* Vol. 28. Academic Press. p. 33–  
719 74. [accessed 2020 Apr 20].  
720 <http://www.sciencedirect.com/science/article/pii/S0065345408602156>.
- 721 Whitehead H, James R. 2015. Generalized affiliation indices extract affiliations from social  
722 network data. *Methods Ecol Evol.* 6(7):836–844. doi:10.1111/2041-210X.12383.
- 723 Wilkinson GS, Carter GG, Bohn KM, Adams DM. 2016. Non-kin cooperation in bats. *Phil*  
724 *Trans R Soc B.* 371(1687):20150095. doi:10.1098/rstb.2015.0095.
- 725 Wiszniewski J, Lusseau D, Möller LM. 2010. Female bisexual kinship ties maintain social  
726 cohesion in a dolphin network. *Anim Behav.* 80(5):895–904.  
727 doi:10.1016/j.anbehav.2010.08.013.
- 728 Wittemyer G, Okello JBA, Rasmussen HB, Arctander P, Nyakaana S, Douglas-Hamilton I,  
729 Siegismund HR. 2009. Where sociality and relatedness diverge: the genetic basis for  
730 hierarchical social organization in African elephants. *Proc R Soc B Biol Sci.*  
731 276(1672):3513–3521. doi:10.1098/rspb.2009.0941.

732 Wolf JBW, Trillmich F. 2008. Kin in space: social viscosity in a spatially and genetically  
733 substructured network. *Proc R Soc Lond B Biol Sci.* 275(1647):2063–2069.  
734 doi:10.1098/rspb.2008.0356.

735

736

737



738 **Tables**

739 **Table 1: Multiple Regression Quadratic Assignment Procedure and the influence of all**  
 740 **structural variables on shark social associations.** Matrices representing structural variables  
 741 (predictors) were regressed against the association matrix (SRI) using a subset of the individuals  
 742 in the population ( $n = 43$ ) to which genetic relatedness was available. TO: temporal overlap; SO:  
 743 spatial overlap; Gregariousness: typical number of associates based on (Godde et al. 2013); Size  
 744 and Sex: binary matrices where individuals of the same size/sex classes are represented by 1, and  
 745 different classes by 0. Adjusted  $R^2$  indicates how much of the variation on association indices  
 746 was explained by the predictors. Significant predictors in which  $P$ -values are given by the  
 747 proportion of times the empirical regression coefficient was smaller or greater than the null  
 748 expectancy from 20,000 randomisations ( $P$ -values are complementary, totalling 1) are indicated  
 749 in bold. We considered all predictors were significant when  $\beta \leq r$ , thus  $P > 0.95$  (\*\*).

750

| Period (SRI) | Predictors     | Regression Coefficient ( $\beta$ ) | $P$ ( $\beta \geq r$ ) | $P$ ( $\beta \leq r$ ) | Adjusted $R^2$ |
|--------------|----------------|------------------------------------|------------------------|------------------------|----------------|
| All          | <b>TO</b>      | 0.5534                             | 1.000**                | <0.001*                | 94%            |
|              | <b>SO</b>      | 0.1069                             | 1.000**                | <0.001*                |                |
|              | Gregariousness | -0.0018                            | <0.001                 | 1.000                  |                |
|              | Size           | 0.0057                             | 0.9101                 | 0.0895                 |                |
|              | Sex            | -0.0025                            | 0.0003                 | 0.9996                 |                |

751

752

753 **Table 2** Results of Mantel test for the correlation between the simple-ratio association (SRI)  
 754 and generalized affiliations (GAI) matrices and the pairwise genetic relatedness among  
 755 individual sharks for each period and each sex relationship. Observed estimates were  
 756 compared to those of 20,000 estimates from the randomized networks and significant p-  
 757 values are indicated in bold.

| Index         | SRI            |               | GAI            |         |
|---------------|----------------|---------------|----------------|---------|
|               | Estimate (rho) | p-value       | Estimate (rho) | p-value |
| Male-male     | 0.1028         | <b>0.0267</b> | 0.0404         | 0.4187  |
| Female-female | -0.0653        | 0.5767        | 0.0361         | 0.7644  |
| Male-female   | 0.0136         | 0.8291        | -0.0240        | 0.7050  |

758

759

760

761 **Table 3** Effects of sex on shark gregariousness (degree and strength) in the social network.

|          |                  | Coefficient | SE    | t statistic | $P_{rand}$        |
|----------|------------------|-------------|-------|-------------|-------------------|
| Degree   | <i>Intercept</i> | 17.308      | 1.800 | 9.613       |                   |
|          | Sex (male)       | 4.726       | 2.156 | 2.192       | <b>&lt; 0.001</b> |
| Strength | <i>Intercept</i> | 4.493       | 0.468 | 9.596       |                   |
|          | Sex (male)       | 0.369       | 0.560 | 0.660       | 0.548             |

762

763

764

765

766

767

768

769

770 **Table 4** Community level information on structure, association and affiliation indices, and  
 771 genetic relatedness. For each social index (SRI and GAI) and each community, are reported  
 772 number of community members (no. of individuals), mean index value, mean genetic  
 773 relatedness and p-values of the tests for within-between differences in relatedness.

| Index | Communities | Modularity Q | No. of individuals | Mean index (SD) | Mean r (SE)   | <i>p-values</i> |
|-------|-------------|--------------|--------------------|-----------------|---------------|-----------------|
| SRI   | Overall     | 0.493        | 43                 | 0.133 (0.210)   | 0.071 (0.005) | 0.093           |
|       | Red         |              | 14                 | 0.487 (0.178)   | 0.071 (0.009) | 0.267           |
|       | Yellow      |              | 9                  | 0.256 (0.307)   | 0.073 (0.016) | 0.24            |
|       | Green       |              | 20                 | 0.282 (0.194)   | 0.069 (0.006) | 0.11            |
| GAI   | Overall     | 0.312        | 43                 | -0.028 (0.126)  | 0.060 (0.006) | 0.722           |
|       | Red         |              | 1                  | /               | /             | /               |
|       | Yellow      |              | 12                 | 0.078 (0.147)   | 0.056 (0.010) | 0.707           |
|       | Green       |              | 6                  | -0.003 (0.155)  | 0.043 (0.015) | 0.735           |
|       | Cyan        |              | 13                 | 0.022 (0.127)   | 0.066 (0.009) | 0.415           |
|       | Purple      |              | 11                 | 0.053 (0.140)   | 0.061 (0.013) | 0.408           |

774

775 **Figure legends:**

776 **Figure 1** Map of the study location indicating the monitored sites along the 10 km reef edge  
777 of the North coast of Moorea.

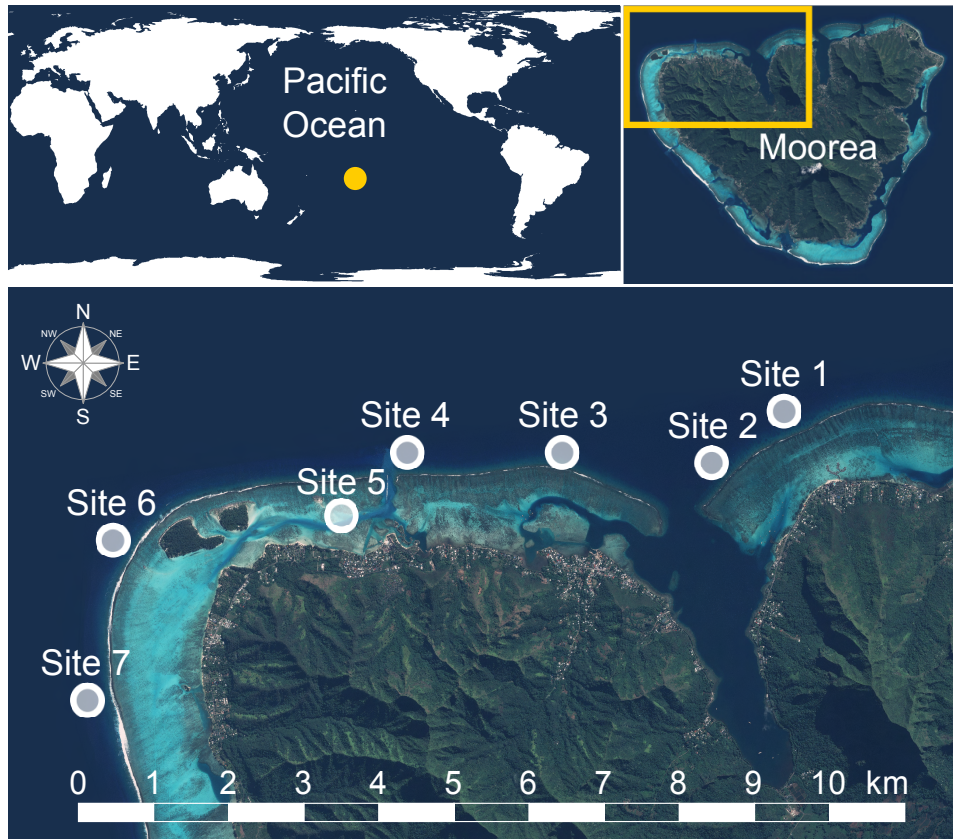

778

779 **Figure 2** Shark social preferences at the individual and population levels. Nodes ( $N = 43$ ;  
780 male:female = 30:13) representing photo-identified individuals are proportional to their size  
781 and colour-coded by social modules; individuals are connected by links whose thicknesses  
782 are proportional to SRI in the association networks (left panel), and to GAI removing  
783 confounding factors in the affiliation networks where only positive GAIs are plotted (right  
784 panel). In the density plots, red dots denote statistically significant observed values, shaded  
785 distributions indicate null expectancy and blue whiskers indicate 95% confidence intervals.  
786 The shark social network is characterized by (a) significant standard deviations (SD) of SRI  
787 and GAI indicating social preferences and (b) significant modularity ( $Q$ ) indicating social

788 division. In (c) are represented the density distribution of sightings of social community  
 789 members.

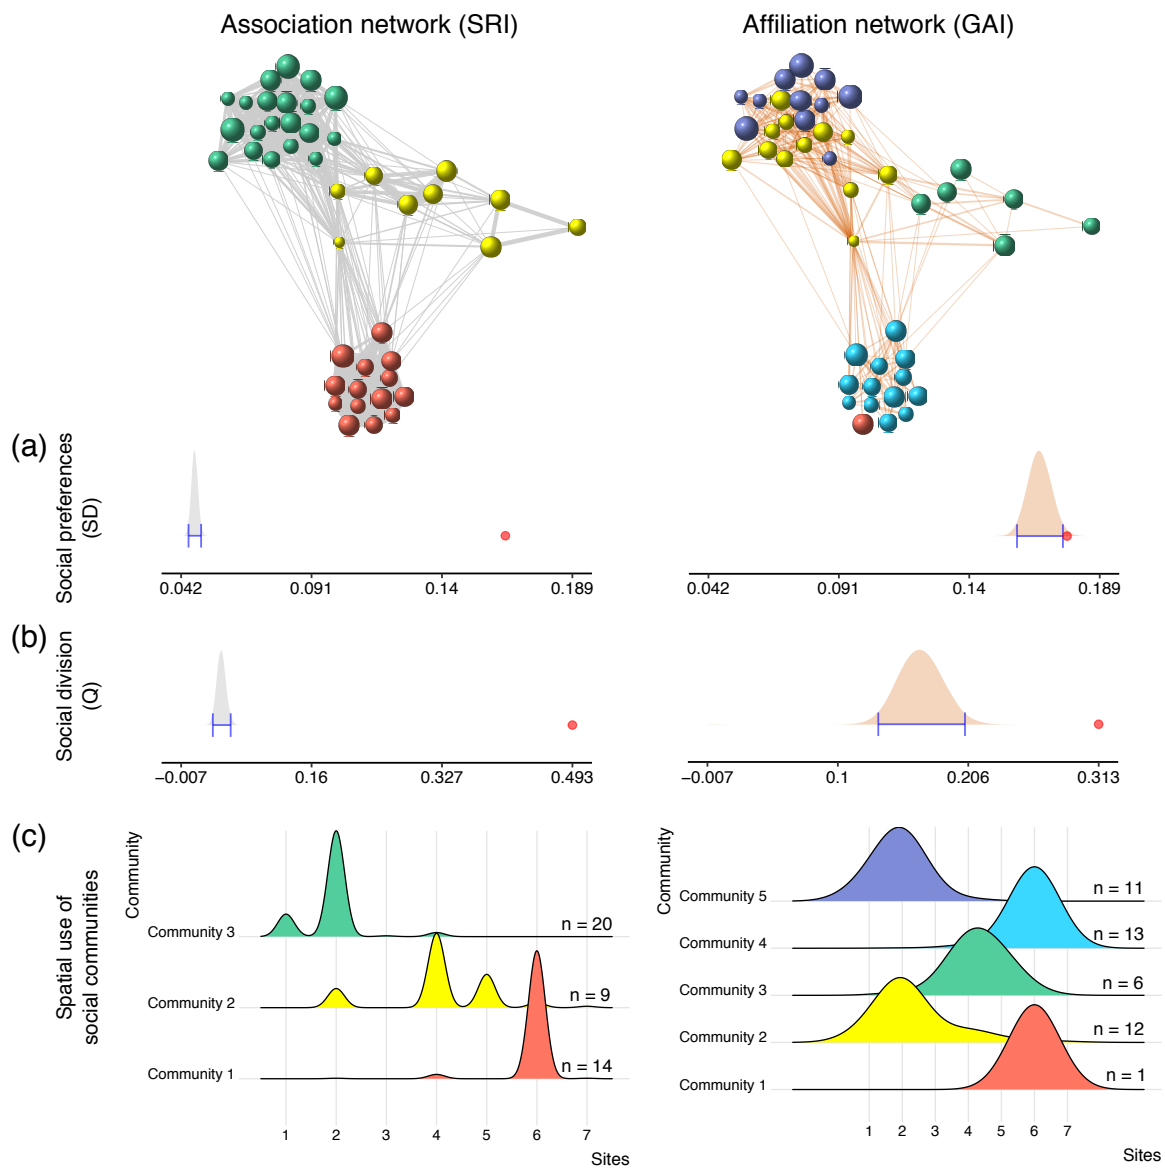

790

791

792 **Figure 3** (a) Genetic network using the same layout as in Figure 2 where nodes ( $N = 43$ ;  
 793 male:female = 30:13) are proportional to individual size and colour-coded by sex (males in  
 794 grey and females in white) and edges are proportional to genetic relatedness in the genetic  
 795 network (only close kin are plotted, i.e.  $r > 0.25$ ). (b) Differences in gregariousness (degree  
 796 and strength) of individual sharks between males and females (colours: pink indicates

797 females and blue indicates males). Comparison of the coefficient from the GLM based on the  
798 observed data (red vertical line) and the frequency distribution of coefficients from the same  
799 model based on the randomized data are indicated over each box plot to report significance of  
800 the difference. (c) Relationship between association and affiliation indices and the triadic  
801 likelihood estimator (TrioML) of genetic relatedness in male-male, female-female and male-  
802 female pairs.

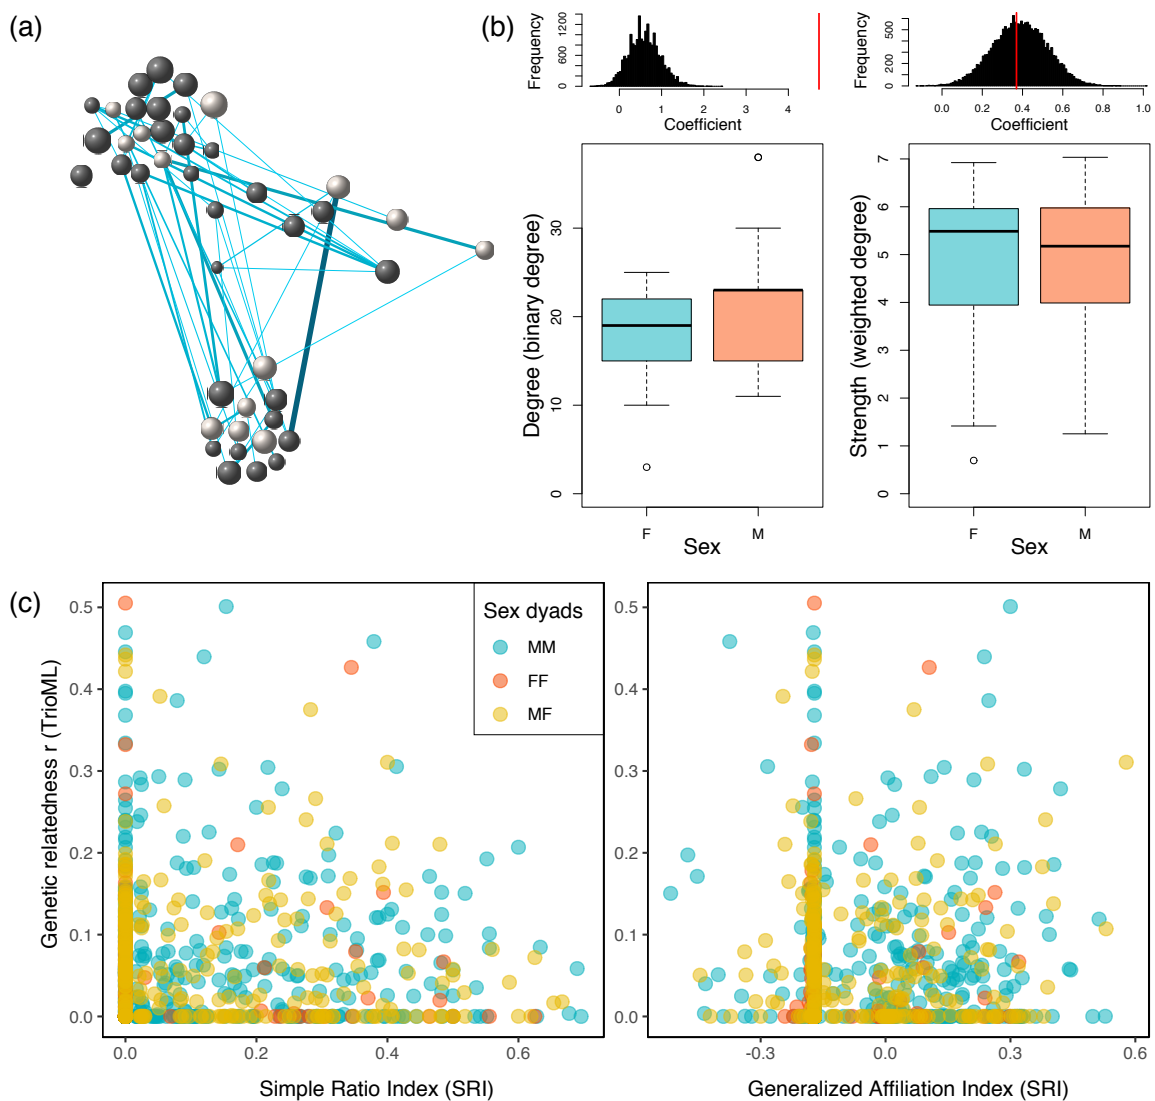

803

804

805

806 **Figure 4** Numbers of close kin ( $r > 0.25$ , the expected value of half-sibs) within and between  
807 social communities for association (SRI) and affiliation (GAI) indices.

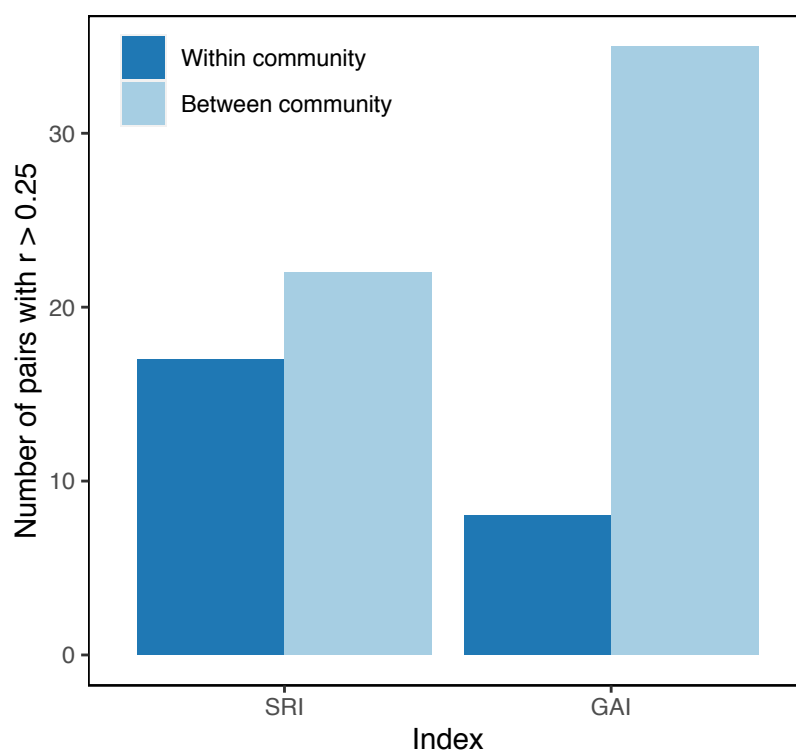

808
